# Supplementary material
Source: PubMed Central journal article supplement (PMC6717896)
Supplement: EMBJ-38-e102870-s001.pdf [file EMBJ-38-e102870-s001.pdf]

# Appendix

**Nuclear RNA export factor variant initiates piRNA-guided co-transcriptional silencing**

**Kensaku Murano, Yuka W. Iwasaki, Hirotsugu Ishizu, Akane Mashiko, Aoi Shibuya, Shu Kondo, Shungo Adachi, Saori Suzuki, Kuniaki Saito, Tohru Natsume, Mikiko C. Siomi, Haruhiko Siomi**

## **Table of contents**

|                    |        |
|--------------------|--------|
| Appendix Figure S1 | Page 1 |
| Appendix Figure S2 | Page 2 |
| Appendix Table S1  | Page 3 |
| Appendix Table S2  | Page 4 |
| Appendix Table S3  | Page 5 |

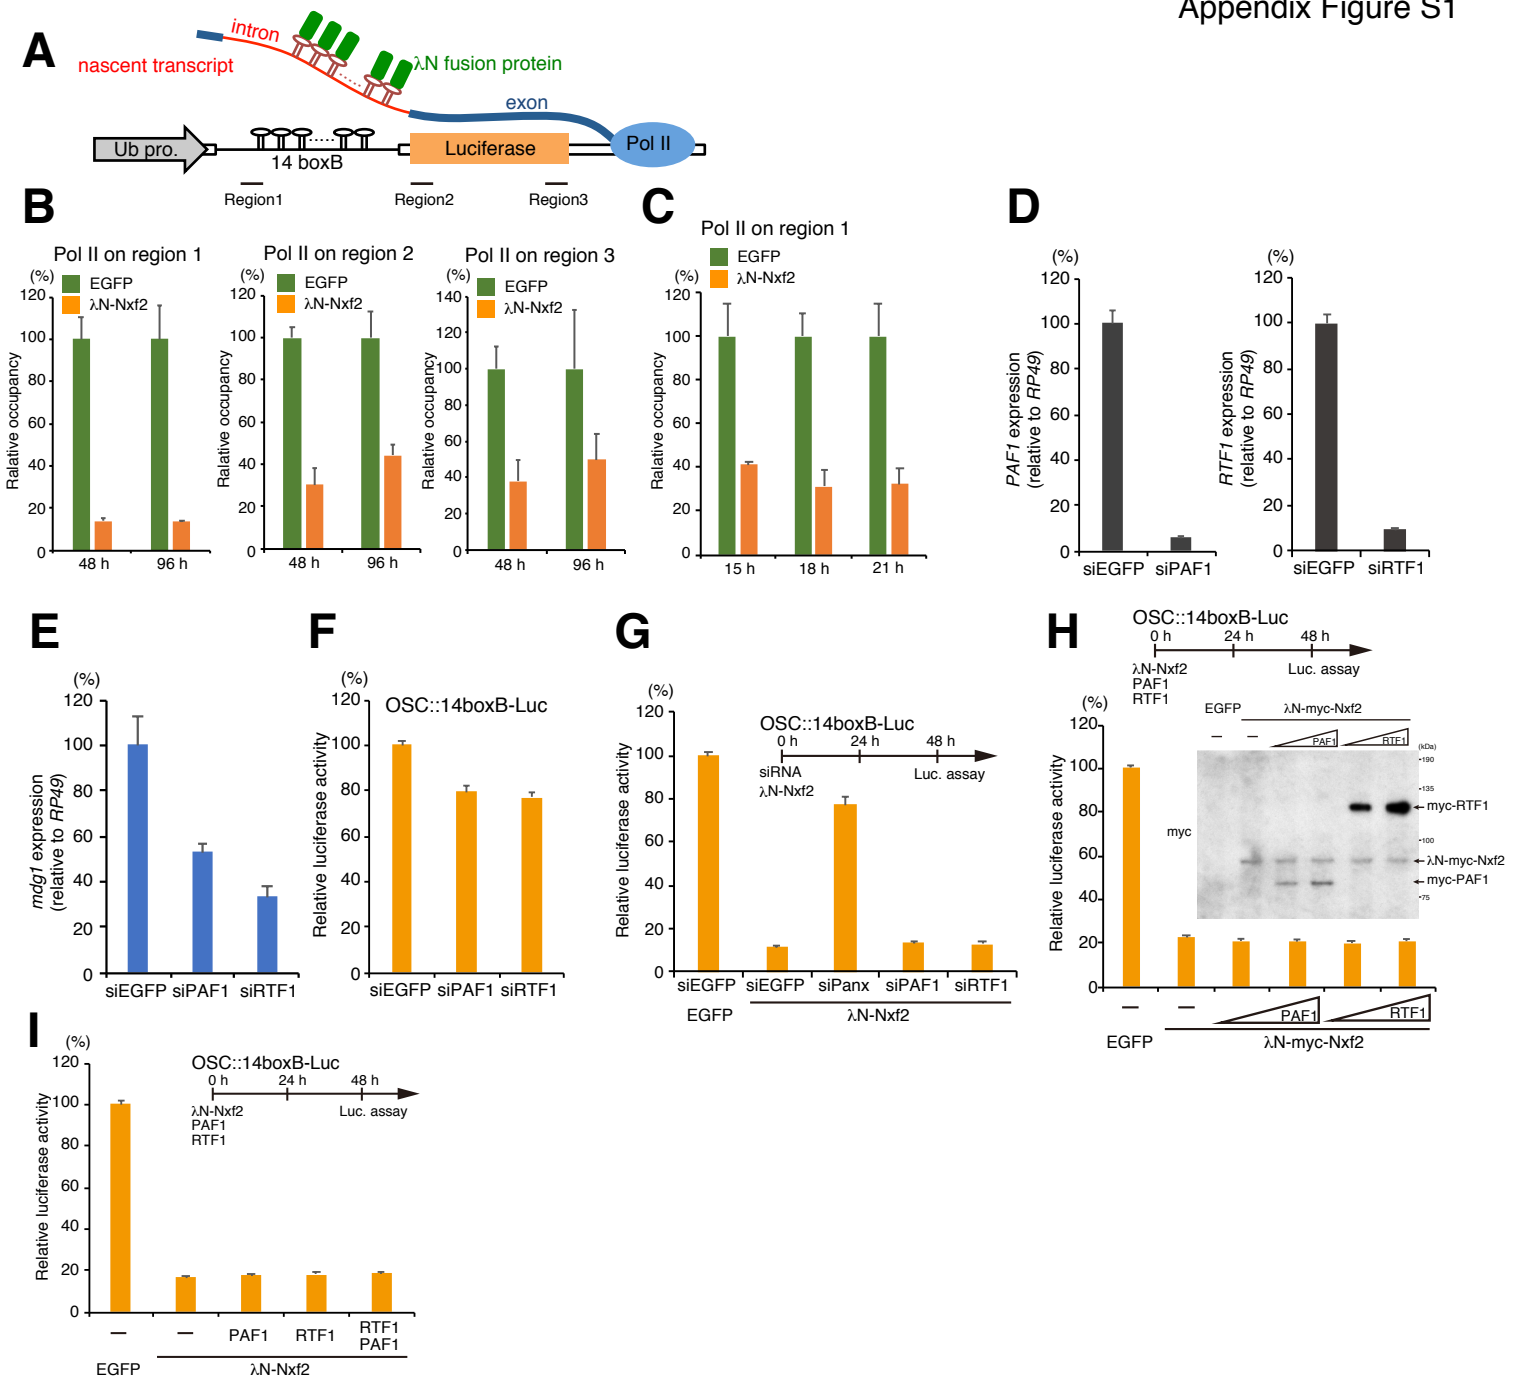

### Appendix Figure S1. Related to Discussion.

(A) The scheme shows regions targeted by qPCR, following ChIP experiments.

(B) ChIP-qPCR analysis of RNA polymerase II (Pol II) occupancy on the reporter gene upon λN-Nxf2 tethering. Bar graph shows the occupancy relative to that of EGFP. Error bars indicate SD (n=3). OSCs were harvested at 48 or 96 h.

(C) Time course of Pol II occupancy on region 1, immediate upstream of 14 boxB sites, upon λN-Nxf2 tethering. OSCs were harvested at the indicated time points. Error bars indicate SD (n=3). Contrary to our expectations, Pol II accumulation by the enforced tethering of Nxf2 at 14 boxB sites was not observed.

(D) RNA levels of *PAF1* and *RTF1* were quantified by qRT-PCR upon treatment of siEGFP (control), siPAF1, or siRTF1. Error bars represent SD (n=3).

(E) RNA level of *mdg1* was quantified by qRT-PCR upon treatment of siEGFP (control), siPAF1, or siRTF1. Error bars represent SD (n=3). Depletion of PAF1 or RTF1 enhanced the silencing of *mdg1* in OSCs.

(F) Depletion of PAF1 and RTF1 slightly weakened the luciferase activities from the reporter gene with 14 boxB sites integrated in the OSC genome. Error bars represent SD (n=4).

(G) Effects of knockdown of PAF1 and RTF1 on boxB reporter activity upon λN-Nxf2 expression. Bar graph shows luciferase activity relative to that of the sample co-transfected with myc-EGFP and siEGFP (control). Error bars indicate SD (n=4). Transfection schedule of siRNA and protein expression plasmids is shown at the top of the figures. Depletion of PAF1 or RTF1 had no impact on the silencing by the enforced tethering of Nxf2 on a nascent transcript.

(H and I) Effects of exogenous expression of PAF1 and RTF1 on boxB reporter activity upon λN-Nxf2 expression. Bar graph shows luciferase activity relative to that of the sample transfected with myc-EGFP (control). Error bars indicate SD (n=4). Transfection schedule of plasmids is shown at the top of the figures. Exogenous expression of PAF1 or RTF1 did not cancel the silencing by the enforced tethering of Nxf2 on a nascent transcript.

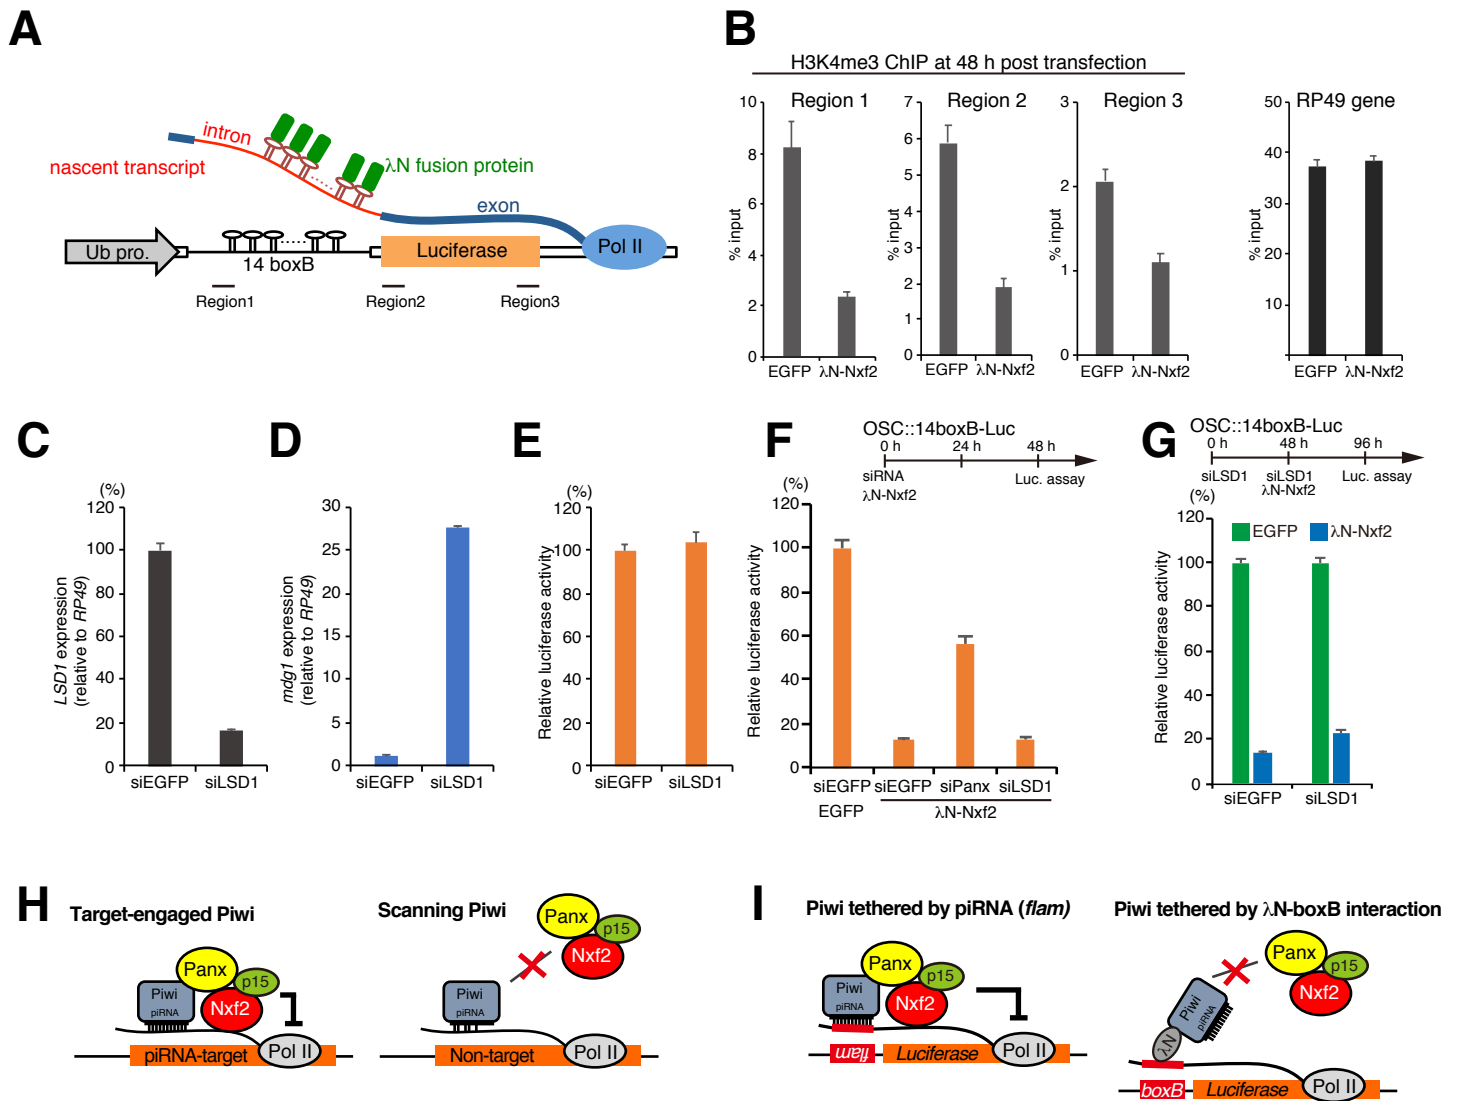

### Appendix Figure S2. Related to Discussion.

(A) The scheme shows regions targeted by qPCR, following ChIP experiments.

(B) ChIP-qPCR analysis of H3K4me3 occupancy on the reporter gene (14 boxB-Luc reporter gene integrated into the genome) upon  $\lambda$ N-Nxf2 tethering. Bar graph shows % input. Error bars indicate SD (n=3). Regions targeted by qPCR are shown in (A). OSCs were harvested at 48 h post-transfection (hpt). H3K4 methylation is a transcriptionally active marker. Although occupancy of H3K4me3 on the *RP49* gene was not affected by  $\lambda$ N-Nxf2 expression, the occupancy of H3K4me3 on the reporter gene decreased even at an earlier time point (48 hpt).

(C) RNA level of *LSD1* was quantified by qRT-PCR upon treatment of siEGFP (control) or siLSD1. Error bars represent SD (n=3).

(D) RNA level of *mdg1* was quantified by qRT-PCR upon treatment of siEGFP (control) or siLSD1. Error bars represent SD (n=3). *mdg1* was de-silenced by LSD1 depletion.

(E) Luciferase activity was not affected by depletion of LSD1. Error bars represent SD (n=4)

(F and G) Effects of knockdown of LSD1 on boxB reporter activity upon  $\lambda$ N-Nxf2 expression. Bar graph shows luciferase activity relative to that of the sample co-transfected with myc-EGFP and siEGFP (control). Error bars indicate SD (n=4). Transfection schedule of siRNA and protein expression plasmids is shown at the top of the figures. Depletion of LSD1 had limited impact on the silencing by the forced tethering of Nxf2 on a nascent transcript.

(H) Schematic model showing the target-engaged Piwi. "The target-engaged Piwi" can recruit the Panx-Nxf2-p15 complex to the target, which elicits co-transcriptional repression. However, "the scanning Piwi" is in the process of searching for targets through random interaction between piRNA and transcripts, many of which likely show partial complementarity. The scanning Piwi cannot recruit Panx-Nxf2-p15 complex to the target.

(I) Schematic model showing Piwi that is targeted by piRNA or is tethered by  $\lambda$ N-boxB interaction in the reporter systems. Piwi targeted by piRNA derived from the *flam* locus can recruit the Panx-Nxf2-p15 complex to the reporter gene, leading to co-transcriptional silencing. Piwi tethered by  $\lambda$ N-boxB interaction cannot recruit the Panx-Nxf2-p15 complex to the reporter gene, and thus fails to induce silencing.

## Upper band

| Rank | Description                                                   | Accession | emPAI | Score | Mass  | Sequence coverage (%) |
|------|---------------------------------------------------------------|-----------|-------|-------|-------|-----------------------|
| 1    | Piwi [Drosophila melanogaster]                                | 429892668 | 8.06  | 1054  | 97037 | 70                    |
| 2    | piwi, partial [Drosophila simulans]                           | 418207352 | 2.65  | 535   | 95840 | 46                    |
| 3    | GH10652p [Drosophila melanogaster]                            | 20976828  | 2.05  | 698   | 88155 | 51                    |
| 4    | rasputin [Drosophila melanogaster]                            | 7739653   | 1.63  | 531   | 74940 | 43                    |
| 5    | DNA ligase III [Drosophila melanogaster]                      | 84796152  | 1.33  | 579   | 90791 | 44                    |
| 6    | Fmr1, isoform G [Drosophila melanogaster]                     | 383292605 | 1.32  | 303   | 80980 | 29                    |
| 7    | CG10077, partial [Drosophila busckii]                         | 924558740 | 0.72  | 294   | 86515 | 30                    |
| 8    | combgap, isoform B [Drosophila melanogaster]                  | 21645407  | 0.67  | 270   | 83703 | 14                    |
| 9    | single-stranded recognition protein [Drosophila melanogaster] | 290280    | 0.6   | 227   | 81645 | 30                    |
| 10   | belle, isoform A [Drosophila melanogaster]                    | 17985987  | 0.57  | 162   | 85029 | 24                    |

## Middle band

| Rank | Description                                                  | Accession | emPAI | Score | Mass  | Sequence coverage (%) |
|------|--------------------------------------------------------------|-----------|-------|-------|-------|-----------------------|
| 1    | Fmr1, isoform A [Drosophila melanogaster]                    | 19922726  | 7.94  | 1237  | 76030 | 64                    |
| 2    | hsp 82 [Drosophila melanogaster]                             | 8127      | 4.9   | 946   | 81814 | 61                    |
| 3    | nuclear RNA export factor 2 (NXF2) [Drosophila melanogaster] | 14456090  | 2.03  | 703   | 96573 | 41                    |
| 4    | Nnp-1 [Drosophila melanogaster]                              | 7298046   | 1.02  | 276   | 78947 | 34                    |
| 5    | belle, isoform A [Drosophila melanogaster]                   | 7299061   | 0.83  | 201   | 85029 | 32                    |
| 6    | Bj6 protein [Drosophila melanogaster]                        | 7662      | 0.74  | 201   | 77005 | 27                    |
| 7    | DNA replication factor MCM7 [Drosophila melanogaster]        | 4903288   | 0.69  | 155   | 81232 | 22                    |
| 8    | eIF3-S9, isoform A [Drosophila melanogaster]                 | 7302767   | 0.61  | 157   | 80391 | 30                    |
| 9    | GH14068 [Drosophila grimshawi]                               | 193891778 | 0.53  | 322   | 80175 | 19                    |
| 10   | rasputin [Drosophila melanogaster]                           | 7739653   | 0.41  | 110   | 74940 | 14                    |

## Lower band

| Rank | Description                                                               | Accession | emPAI | Score | Mass  | Sequence coverage (%) |
|------|---------------------------------------------------------------------------|-----------|-------|-------|-------|-----------------------|
| 1    | CG9754/Panoramix/Silencio [Drosophila melanogaster]                       | 7291281   | 5.57  | 617   | 61110 | 45                    |
| 2    | no-on-transient A product form I [Drosophila melanogaster]                | 157978    | 4     | 610   | 76920 | 48                    |
| 3    | AT19081p [Drosophila melanogaster]                                        | 21429758  | 2.82  | 499   | 79722 | 44                    |
| 4    | RecName: Full=Protein claret segregational                                | 127945    | 2.75  | 684   | 77426 | 55                    |
| 5    | glucosidase 2 beta subunit, isoform A [Drosophila melanogaster]           | 7298396   | 1.46  | 309   | 61501 | 34                    |
| 6    | uncharacterized protein Dmel_CG10565, isoform A [Drosophila melanogaster] | 7296390   | 0.79  | 150   | 73575 | 23                    |
| 7    | Fragile X related [Drosophila melanogaster]                               | 6503206   | 0.76  | 208   | 75773 | 28                    |
| 8    | belle, isoform A [Drosophila melanogaster]                                | 7299061   | 0.65  | 134   | 85029 | 32                    |
| 9    | CG8368, isoform A [Drosophila melanogaster]                               | 7295335   | 0.56  | 183   | 76671 | 35                    |
| 10   | LD25239p [Drosophila melanogaster]                                        | 16198023  | 0.52  | 196   | 71051 | 10                    |

**Appendix Table S1. List of proteins detected in MS analysis (related to Figure 1)**

Proteins detected by MS analysis of indicated bands from Panx-immunoprecipitation followed by silver staining (Fig 1A) are listed with their accession number, emPAI, Score, Mass, and Sequence coverage.

| Protein                             | Annotation Symbol | Significance (p-value, $-\log_{10}$ ) | Enrichment (peptide count in flag-Nxf2 IP +1/Control IP +1, $\log_2$ ) |
|-------------------------------------|-------------------|---------------------------------------|------------------------------------------------------------------------|
| Nxf2                                | CG4118            | 5.32                                  | 5.71                                                                   |
| Hsc70-4                             | CG4264            | 4.05                                  | 5.23                                                                   |
| betaTub56D                          | CG9277            | 3.50                                  | 4.52                                                                   |
| Panx                                | CG9754            | 3.37                                  | 5.09                                                                   |
| alphaTub84B alphaTub84D alphaTub85E | CG1913            | 3.36                                  | 4.86                                                                   |
| HtrA2                               | CG8464            | 3.35                                  | 4.17                                                                   |
| betaTub56D betaTub85D               | CG9277            | 2.92                                  | 3.91                                                                   |
| alphaTub84B alphaTub84D             | CG1913            | 2.52                                  | 4.17                                                                   |
| blw                                 | CG3612            | 2.49                                  | 3.46                                                                   |
| Hsc70-3 Hsc70-4                     | CG4147            | 2.49                                  | 3.46                                                                   |
| CG7194                              | CG7194            | 2.22                                  | 4.46                                                                   |
| CklIIalpha                          | CG17520           | 2.22                                  | 3.00                                                                   |
| Hrb98DE                             | CG9983            | 2.22                                  | 3.00                                                                   |
| Ant2 sesB                           | CG1683            | 1.98                                  | 3.58                                                                   |
| Droj2                               | CG8863            | 1.91                                  | 3.91                                                                   |
| DnaJ-1                              | CG10578           | 1.86                                  | 2.81                                                                   |
| betaTub56D betaTub60D betaTub85D    | CG9277            | 1.81                                  | 2.58                                                                   |
| Cctgamma                            | CG8977            | 1.81                                  | 2.58                                                                   |
| p15 (Nxt1)                          | CG12752           | 1.79                                  | 3.17                                                                   |
| UQCR-C2                             | CG4169            | 1.74                                  | 4.25                                                                   |
| Fib                                 | CG9888            | 1.74                                  | 3.32                                                                   |
| Ssrp                                | CG4817            | 1.72                                  | 3.58                                                                   |
| ATPsynbeta                          | CG11154           | 1.62                                  | 3.70                                                                   |
| lost                                | CG14648           | 1.55                                  | 4.46                                                                   |
| porin                               | CG6647            | 1.52                                  | 3.46                                                                   |
| Ef1alpha100E Ef1alpha48D            | CG1873            | 1.49                                  | 4.25                                                                   |
| Hsp68                               | CG5436            | 1.45                                  | 3.00                                                                   |
| sqd                                 | CG16901           | 1.45                                  | 4.00                                                                   |
| T-cp1                               | CG5374            | 1.45                                  | 4.00                                                                   |
| Hsp26                               | CG4183            | 1.39                                  | 3.17                                                                   |
| Rpn2                                | CG11888           | 1.24                                  | 3.32                                                                   |
| Grip71                              | CG10346           | 1.20                                  | 3.46                                                                   |
| CG14207                             | CG14207           | 1.10                                  | 2.58                                                                   |
| Rpt6                                | CG1489            | 1.10                                  | 2.58                                                                   |
| AGO2                                | CG7439            | 1.08                                  | 4.17                                                                   |
| Hsp83                               | CG1242            | 1.06                                  | 4.32                                                                   |
| Hsc70-3                             | CG4147            | 0.99                                  | 2.81                                                                   |
| I(2)gl                              | CG2671            | 0.90                                  | 3.91                                                                   |
| CG6439                              | CG6439            | 0.88                                  | 3.00                                                                   |
| Hsp23                               | CG4463            | 0.87                                  | 3.32                                                                   |
| Hsp27                               | CG4466            | 0.85                                  | 2.58                                                                   |
| hyd                                 | CG9484            | 0.82                                  | 4.39                                                                   |
| Tcp-1zeta                           | CG8231            | 0.80                                  | 4.25                                                                   |
| CG9281                              | CG9281            | 0.74                                  | 4.39                                                                   |
| dre4                                | CG1828            | 0.74                                  | 3.17                                                                   |
| eIF-4a                              | CG9075            | 0.74                                  | 3.17                                                                   |
| spn-E                               | CG3158            | 0.74                                  | 2.81                                                                   |
| pAbp                                | CG5119            | 0.73                                  | 4.09                                                                   |
| Piwi                                | CG6122            | 0.71                                  | 2.58                                                                   |
| 14-3-3zeta                          | CG17870           | 0.71                                  | 2.58                                                                   |
| bel                                 | CG9748            | 0.71                                  | 2.58                                                                   |
| Hop                                 | CG2720            | 0.71                                  | 2.58                                                                   |
| Nap1                                | CG5330            | 0.71                                  | 2.58                                                                   |
| PyK                                 | CG7070            | 0.71                                  | 2.58                                                                   |
| r                                   | CG18572           | 0.71                                  | 2.58                                                                   |
| Rpt3                                | CG16916           | 0.71                                  | 2.58                                                                   |
| Mtor                                | CG8274            | 0.70                                  | 3.81                                                                   |
| Dcr-2                               | CG6493            | 0.70                                  | 3.17                                                                   |
| CG8258                              | CG8258            | 0.56                                  | 2.58                                                                   |
| smid                                | CG8571            | 0.56                                  | 2.58                                                                   |

### Appendix Table S2. List of proteins detected in shotgun proteome analysis of flag-Nxf2 (related to Figure 2)

Proteins detected with shotgun proteome analysis of flag-Nxf2 immunoprecipitants are listed. Enrichment of peptide obtained by flag-Nxf2 IP over Control IP ( $\log_2$  value of peptide count+1), and significance calculated by replicate experiments as the p-value ( $-\log_{10}$ ) are listed along with protein name and annotation symbol. Proteins with significance over 0.5 and enrichment over 2.5 are indicated (ribosomal proteins are excluded from the list).

| Name                 | Sequence                                                         | Usage                                  | Vector construction method          |
|----------------------|------------------------------------------------------------------|----------------------------------------|-------------------------------------|
| BoxB_EcoRIfor        | gatGAATTTCGCTAGCTCCCTAAGTCCAACT                                  | Described in the Methods section       | Described in the Methods section    |
| BoxB_XhoIrev         | gacCTCGAGATAATATCCTCGATAGGGCC                                    |                                        |                                     |
| BoxB_Sallfor         | gatGTGACGCTAGCTCCCTAAGTCCAACT                                    |                                        |                                     |
| Fluc_KpnIfor         | acgIggIaccacatgagcgaagcgcacaaacataaagaaag                        | pAc-Fluc-5boxB vector construction     | RE digest with KpnI/EcoRI           |
| Fluc_EcoRIrev        | acgtggaattcttcaCAATTTGGAACTTTCCGCCCTTCTTGG                       |                                        |                                     |
| Ubpro_BamHIfor       | GA1TgattccGAAGCGACTGGGATTTCGGTG                                  | Described in the Methods section       | Described in the Methods section    |
| Ubpro_KpnIrev        | ACGTggtaccGGATTATTCTCGGGGAAGAAAATAGAGATGTG                       |                                        |                                     |
| lambdaN_KpnIfor      | GTTCATTGGTACCAACATGGAGCGCA                                       | pUASp-lambdaN-MCS vector construction  | RE digest with KpnI/NotI            |
| lambdaN_NotIrev      | ctcgagcgccgcgaattggtaccGCTAGCgcGTAATCTGGAAACATC<br>GTATGGGTAAAGC |                                        |                                     |
| lamdaN_NheI_for      | acgtGCTAGCaacATGGAOCGACAAACACGACGCGTG                            | Described in the Methods section       | Described in the Methods section    |
| lamdaN_NheI_rev      | acgtGCTAGCgAGCGTATCTGGAACATCGTATGGGTAAG                          |                                        |                                     |
| Nx2_HindIIIfor       | ATAAGCTTATGCCAAACAGATGAGAG                                       | pAcM-Nx2 vector construction           | RE digest with HindIII/EcoRI        |
| Nx2_EcoRIrev         | ATGAATTCCTAGGGCGAATGCTAGATC                                      |                                        |                                     |
| Nx2-sires-INVfor     | GAACGAGATAAAGCTGCCATCATAAGGGCCCGCTGGAA                           | pAcM-Nx2_sires vector construction     | inverse PCR from pAcM-Nx2           |
| Nx2-sires-INVrev     | CTTATGATGGACAGTTATCTCGTTCCAATGGGTACCC                            |                                        |                                     |
| Nx2delLR_HindIIIfor  | ATAAGCTTAACTGCTGCGACAAGATCTTT                                    | pAcM-Nx2-ΔLR vector construction       | RE digest with HindIII/EcoRI        |
| Nx2delLR_EcoRIrev    | ATGAATTCCTAGGGCGAATGCTAGATC                                      |                                        |                                     |
| Nx2delUBA_HindIIIfor | ATAAGCTTATGCCAAACAGATGAGAG                                       | pAcM-Nx2-ΔUBA vector construction      | RE digest with HindIII/EcoRI        |
| Nx2delUBA_EcoRIrev   | ATGAATTCCTAAACCGGAAATTTACACTGAAAG                                |                                        |                                     |
| Nx2delIC-HindIIIfor  | ATAAGCTTATGCCAAACAGATGAGAG                                       | pAcM-Nx2-ΔC vector construction        | RE digest with HindIII/EcoRI        |
| Nx2delIC_EcoRIrev    | ATGAATTCCTAAACCGGAAATTTACACTGAAAG                                |                                        |                                     |
| Nx2delINTF2_INVfor   | CCAAGTGAACGCTCAGGCGGA                                            | pAcM-Nx2-ΔNTF2 vector construction     | inverse PCR from pAcM-Nx2-sires     |
| Nx2delINTF2_INVrev   | CAACGACTGGCCAGGATTCCG                                            |                                        |                                     |
| Nx1_HindIIIfor       | ATAAGCTTATGCCAAACGCGCGGT                                         | pAcM-Nx1 vector construction           | RE digest with HindIII/EcoRI        |
| Nx1_EcoRIrev         | ATGAATTCCTACTCATAAAGCGCTCAGGCGG                                  |                                        |                                     |
| Nx3_HindIIIfor       | ATAAGCTTATGGGATCCGCTGCGAC                                        | pAcM-Nx3 vector construction           | RE digest with HindIII/EcoRI        |
| Nx3_EcoRIrev         | ATGAATTCCTAAAGGTCATCGCATCCAACAGG                                 |                                        |                                     |
| Panx_KpnIfor         | AATGGTACCAGTGAAGCTCCGATGAAGCT                                    | pAcEGFP-Panx vector construction       | RE digest with KpnI/NotI            |
| Panx_NotIrev         | ATTGCGCGCGCTCACTATGGCTGCGACCCCTTTA                               |                                        |                                     |
| Panx-sires_INVfor    | CCTAAGATGGAAACCGAAGATCAAAGAAGATGCGG                              | pAcEGFP-Panx_sires vector construction | inverse PCR from pAcEGFP-Panx       |
| Panx-sires_INVrev    | CGGCATCTCTTTGATCTCGGTTCCACTCTTAGG                                |                                        |                                     |
| PanxdelC1_INVfor     | TAGGCGGCGCTCGAGTCTA                                              | pAcEGFP-Panx-ΔC1 vector construction   | inverse PCR from pAcEGFP-Panx-sires |
| PanxdelC1_INVrev     | ATTGAGAATTTAATAGGTC                                              |                                        |                                     |
| PanxdelC2_INVfor     | TAGGCGGCGCTCGAGTCTA                                              | pAcEGFP-Panx-ΔC2 vector construction   | inverse PCR from pAcEGFP-Panx-sires |
| PanxdelC2_INVrev     | CAAGCCCATTTAGACAAAT                                              |                                        |                                     |
| PanxdelN_INVfor      | CCGCAAAATGATACGCCCAT                                             | pAcEGFP-Panx-ΔN vector construction    | inverse PCR from pAcEGFP-Panx-sires |
| PanxdelN_INVrev      | CATGGTACCCTGACTGCAG                                              |                                        |                                     |
| p15_HindIIIfor       | AATAAGCTTATGGACAGCGATTTGAAAGC                                    | pAcM-p15 vector construction           | RE digest with HindIII/NotI         |
| p15_NotIrev          | AATGCGCGCGCTCAGACCTCCGATCCGGT                                    |                                        |                                     |
| p15-sires_INVfor     | CAGCAGATAGTTCGCTCTATTGG                                          | pAcM-p15_sires vector construction     | inverse PCR from pAcM-p15           |
| p15-sires_INVrev     | TCTCCTATTGTCACGAGGCGTAG                                          |                                        |                                     |
| Panx-mid_BamHIfor    | AATGGATCCCGGAGCTGATCTCATTGCACA                                   | pGEX-Panx-mid vector construction      | RE digest with BamHI/NotI           |
| Panx-mid_NotIrev     | AATGCGCGCGCTCAGGACTCAATTAACAGGGAGTT                              |                                        |                                     |
| Nx2Full-EcoRIfor     | atgaaTTCAGCCAAACCGATGAGAG                                        | pPET-Nx2-full vector construction      | RE digest with EcoRI/Sall           |
| Nx2Full-Sallrev      | ATGTGACCTAGGGCGAATGCTAGATC                                       |                                        |                                     |
| Nx2LR_BamHIfor       | ATTGATCCCATGCGCAACACAGATGAGAG                                    | pGEX-Nx2-LRR vector construction       | RE digest with BamHI/NotI           |
| Nx2LR_NotIrev        | ATGCGCGCGCTGAGAAAGGCTTCCATCCA                                    |                                        |                                     |
| p15_BamHIfor         | ATTGATCCCATGCGCAACAGCGATTTGAAAG                                  | pGEX-p15 vector construction           | RE digest with BamHI/NotI           |
| p15_NotIrev          | AATGCGCGCGCTCAGACCTCCGATCCGGT                                    |                                        |                                     |
| egg_INVfor           | TGCGAATTTGCTCCCAAGT                                              | pGEX-Egg-Nter vector construction      | inverse PCR from pGEX-Egg-full      |
| egg_INVrev           | TAAGCGGCGCATCGT                                                  |                                        |                                     |
| PAF1for_KpnI         | acgtggtaccATGCCAACCCAGTCAACAAATCCGGC                             | pAcM-PAF1 vector construction          | RE digest with KpnI/NotI            |
| PAF1rev_NotI         | ACGTgagcgcgCTCATCTACTGAGCGCTTCCAGAGC                             |                                        |                                     |
| RTF1for_KpnI         | acgtggtaccATGGGAAACCGCGGAGCGCAATC                                | pAcM-RTF1 vector construction          | RE digest with KpnI/NotI            |
| RTF1rev_NotI         | ACGTgagcgcgCTCATGATAAGACCGCGCTTTTTTGTAACTCT                      |                                        |                                     |
| Panx_for             | CAAAGAGGAGCCACCGGAAT                                             | Panx qPCR                              |                                     |
| Panx_rev             | CTGGATGGCTTAACGTGTC                                              |                                        |                                     |
| Nx2_for              | CCTCGAACGGTTTCACTCCA                                             | Nx2 qPCR                               |                                     |
| Nx2_rev              | AGATCCTGCACCCAGTTGTG                                             |                                        |                                     |
| Piwi_for             | CGACCAAGAACCCAGTGCCT                                             | Piwi qPCR                              |                                     |
| Piwi_rev             | CTCCGTGACTGTGCTGAAGT                                             |                                        |                                     |
| mdg1_for             | AACAGAAACGCCAGCAACAGC                                            | mdg1 qPCR                              |                                     |
| mdg1_rev             | CGTCCCATGTCCGTTGTGAT                                             |                                        |                                     |
| roo_for              | CGTCTGCAATGACTGGCTCT                                             | roo qPCR                               |                                     |
| roo_rev              | CGGCATCCACTAATTCTCC                                              |                                        |                                     |
| HetA_for             | CGCGCGAACCCATCTCAGA                                              | HetA qPCR                              |                                     |
| HetA_rev             | CGCCGAGTCTGTTGGTGAAT                                             |                                        |                                     |
| Ref1_for             | GGCTTGGAAAGCAGATATG                                              | Ref1 qPCR                              |                                     |
| Ref1_rev             | CGTAGTCCAGGTTACCGACG                                             |                                        |                                     |
| RP49_for             | CCGCTTCAAGGAGCAGATCTG                                            | RP49 qPCR                              |                                     |
| RP49_rev             | ATCTGCCGCGATAAACGC                                               |                                        |                                     |
| 14BoxBLuc_ChIPfor    | CAGCCAGCATCTCGTTTTTC                                             | boxB qPCR                              |                                     |
| 14BoxBLuc_ChIPrev    | AGGGAAGCTAGCGTCGAGTGCCT                                          |                                        |                                     |
| Fluc_4_ChIPfor       | GCCGAAGACGCCAAAACAT                                              | Fluc(4-300) qPCR                       |                                     |
| Fluc_300_ChIPrev     | TCCGATAAATAACGCGCCCA                                             |                                        |                                     |
| Fluc_1277RTfor       | ACTGGGACGAAGCGAACAC                                              | Fluc(1277-1512) qPCR                   |                                     |
| Fluc_1512RTrev       | GGGACGTAATCCACGATCT                                              |                                        |                                     |
| PAF1_for             | GCTGGAGGAGGAGACTCTGA                                             | PAF1 qPCR                              |                                     |
| PAF1_rev             | TCTTGGTTCGCTGAAGGTC                                              |                                        |                                     |
| RTF1_for             | CGCTGGCGTCTCTGATTACT                                             | RTF1 qPCR                              |                                     |
| RTF1_rev             | TCACGGCCGATTTACAACCA                                             |                                        |                                     |
| LSD1_for             | TCCAATCTCGCTGCCATT                                               | LSD1 qPCR                              |                                     |
| LSD1_rev             | ACTCGCTTACCAACTGGG                                               |                                        |                                     |
| Piwi-siRNA_for       | GCUCCAGGCGUGAAGUGIT                                              | Piwi RNAi-KD                           |                                     |
| Piwi-siRNA_rev       | CACUUCACGCGUGGAGCIt                                              |                                        |                                     |
| Panx-siRNA_for       | CCGAAGAUJGAGCCCAAGAT                                             | Panx RNAi-KD                           |                                     |
| Panx-siRNA_rev       | UCUJGGGCUCAUCUJCGGIt                                             |                                        |                                     |
| Nx2-siRNA_for        | CGAAUUCACAGUGCACCAUIt                                            | Nx2 RNAi-KD                            |                                     |
| Nx2-siRNA_rev        | AUGGUGCACUGUAUUJCGIt                                             |                                        |                                     |
| p15-siRNA_for        | CCGACGCCAACAAATGGAT                                              | p15 RNAi-KD                            |                                     |
| p15-siRNA_rev        | UCCAAUUJGUGGCGUGGIt                                              |                                        |                                     |
| HP1a-siRNA_for       | GAUCUJGGGUGCCUCGACIt                                             | HP1a RNAi-KD                           |                                     |
| HP1a-siRNA_rev       | GUCGAGGACCCCAAGAUIt                                              |                                        |                                     |
| H1-siRNA_for         | GAAAGAUCCAGAUCCACCCIt                                            | H1 RNAi-KD                             |                                     |
| H1-siRNA_rev         | GGUGCAUCUGGAUCUUJUCIt                                            |                                        |                                     |
| Mael-siRNA_for       | GCACAAGAUCCCAUGAUIt                                              | Mael RNAi-KD                           |                                     |
| Mael-siRNA_rev       | AUCAUGGACAUUCUJGCGIt                                             |                                        |                                     |
| Gtsf1-siRNA_for      | GCTCCAGCAGCACATCTTAt                                             | Gtsf1 RNAi-KD                          |                                     |
| Gtsf1-siRNA_rev      | UAAGAUJGUGUGGUGGAGCIt                                            |                                        |                                     |
| Egg-siRNA_for        | GGTCAAAAGCTATTAGCTIt                                             | Egg RNAi-KD                            |                                     |
| Egg-siRNA_rev        | AGCUAAUCGUGUJGAGCIt                                              |                                        |                                     |
| Ref1-siRNA_for       | CAGCGUJGAGGACGACAUIt                                             | Ref1 RNAi-KD                           |                                     |
| Ref1-siRNA_rev       | AUCGUGUJGAGGCGUGIt                                               |                                        |                                     |
| EGFP-siRNA_for       | GGCAAGCUGACCCUGAAGUIt                                            | EGFP RNAi-KD                           |                                     |
| EGFP-siRNA_rev       | ACUJGAGGUGUGGUGGCGIt                                             |                                        |                                     |
| Luc-siRNA_for        | CGUACGCGGAAUUCUJGAGIt                                            | Luc RNAi-KD                            |                                     |
| Luc-siRNA_rev        | UCGAAAGUJGUGGUGGUGIt                                             |                                        |                                     |
| PAF1-siRNA_for       | CCACCGCUCUGGACGUAIt                                              | PAF1 RNAi-KD                           |                                     |
| PAF1-siRNA_rev       | UACUGCACGAAAGCGUGGIt                                             |                                        |                                     |
| RTF1-siRNA_for       | GGACGAAAGUACAUUGCAIt                                             | RTF1 RNAi-KD                           |                                     |
| RTF1-siRNA_rev       | UJGCAUGUCAUCUJGUGCIt                                             |                                        |                                     |
| LSD1-siRNA_for       | GUCAGGAUCGCAUCAUGIt                                              | LSD1 RNAi-KD                           |                                     |
| LSD1-siRNA_rev       | CAUGGAUGCCGAUCCUGACIt                                            |                                        |                                     |
| endo-siRNA-sit       | GGAGCGAACTTGTGGAGTCAA                                            | esiRNA sit northern blot               |                                     |
| lj-piRNA             | GGTAATGGGAAATGCACCTCTCTTGAA                                      | lj-piRNA northern blot                 |                                     |
| idexif-piRNA         | AAACTACTGGCAATCGTTGGGAA                                          | idexif-piRNA northern blot             |                                     |

**Appendix Table S3. DNA oligonucleotides and siRNAs used in this study, related to experimental procedures**
