# Supplementary material
Source: PubMed Central journal article supplement (PMC6717896)

Source data

**Fig. 1B**

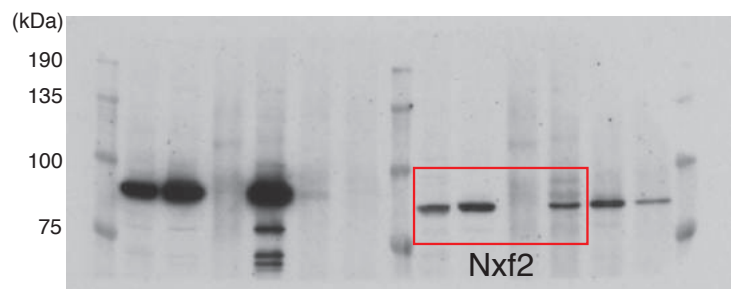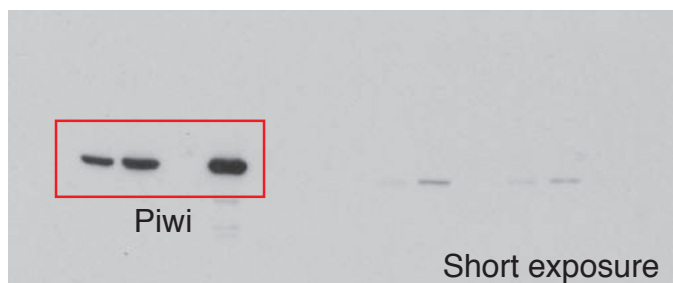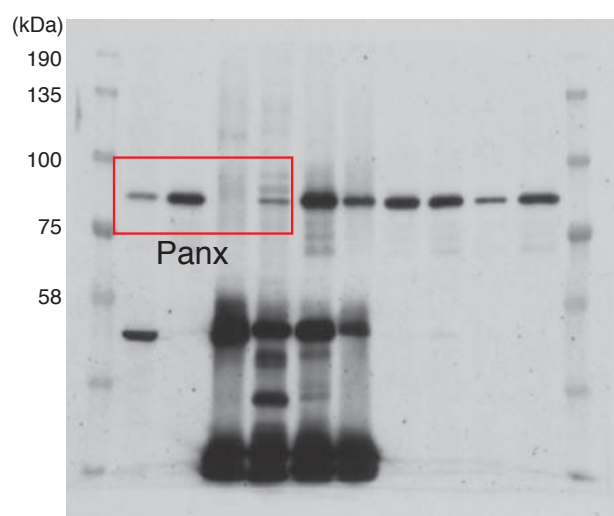

Supplement: EMBJ-38-e102870-s003.pdf [file EMBJ-38-e102870-s003.pdf]

**Fig. 2C**

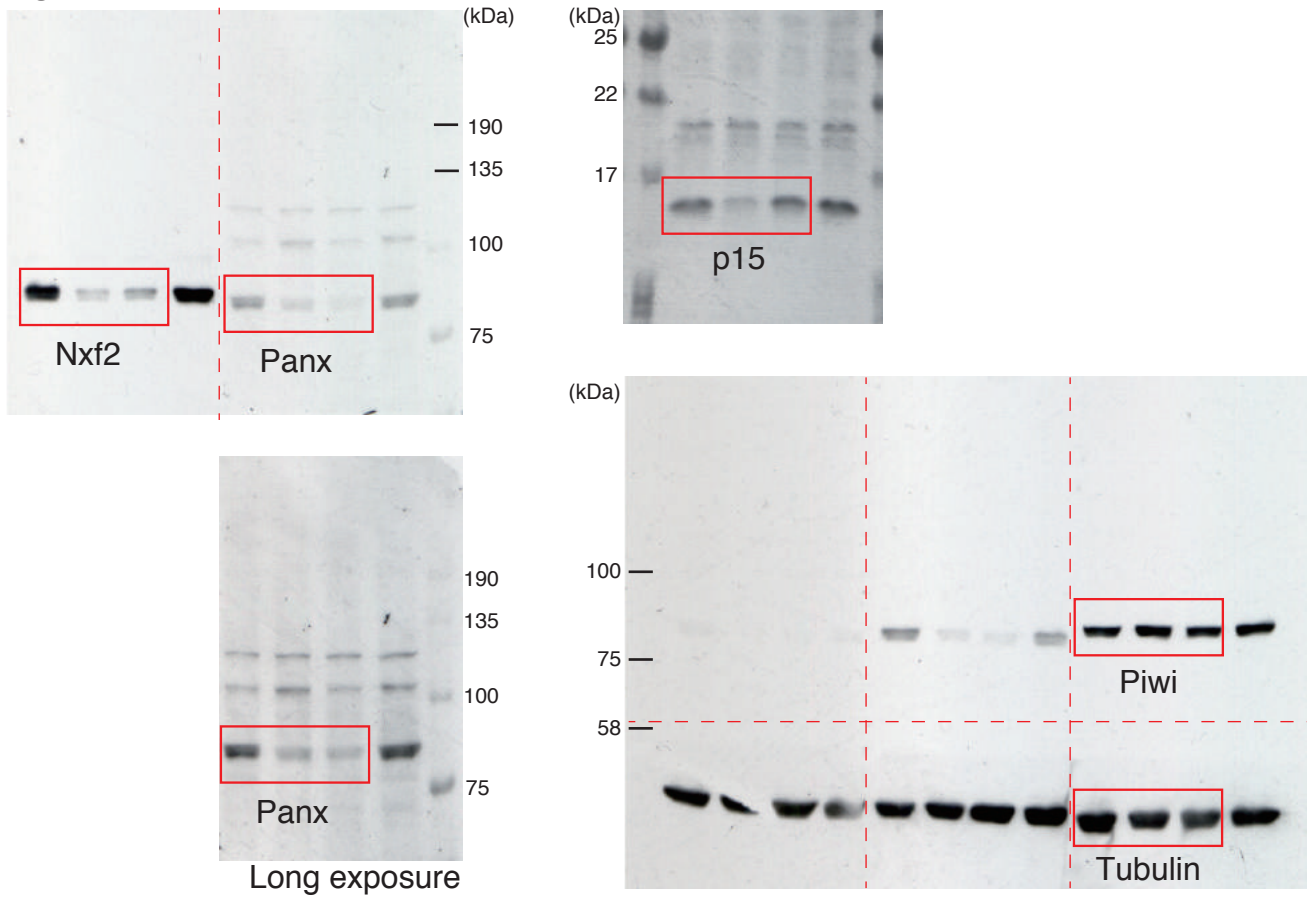

**Fig. 2G**

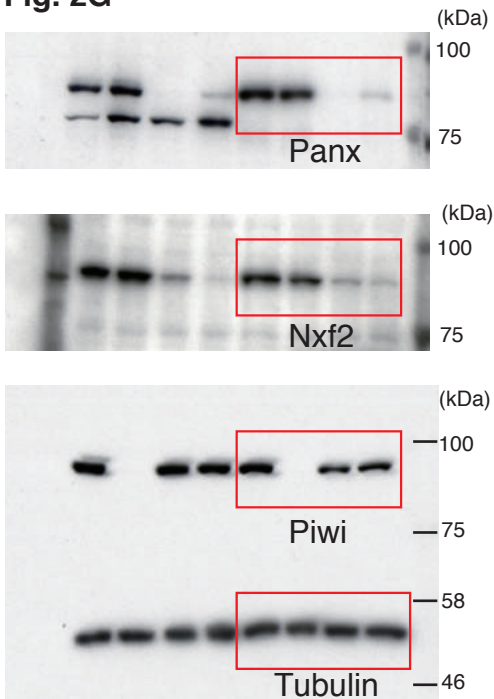

Supplement: EMBJ-38-e102870-s004.pdf [file EMBJ-38-e102870-s004.pdf]
